# Supplementary material for: Self-assembled lipase nanosphere templated one-pot biogenic synthesis of silica hollow spheres in ionic liquid [Bmim][PF6]
Source: Royal Society of Chemistry journal article supplement (doi:10.1039/c5ra22543d), 2015-01-01
Supplement: c5ra22543d1.pdf [file c5ra22543d1.pdf]

## Supplementary information:

### Self-assembled lipase nanosphere templated one-pot biogenic synthesis of silica hollow spheres in Ionic Liquid [Bmim][PF<sub>6</sub>]

**Sampa Sarkar<sup>a</sup>, Kshudiram Mantri<sup>a,b</sup>, Dinesh Kumar<sup>c</sup>, Suresh K Bhargava<sup>a\*</sup>, Sarvesh K Soni<sup>a\*</sup>**

<sup>a</sup> Centre for Advanced Materials and Industrial Chemistry (CAMIC), School of Applied Sciences, RMIT University, Melbourne VIC 3001, Australia.

<sup>b</sup> Reliance Industries Limited, Vadodara, India.

<sup>c</sup> Banasthali University, India

\*Author to whom correspondence should be addressed. Phone: +61 +61 3 9925 2397. Fax: +61 3 9925 2882. E-mail: [sarveshkumar.soni@rmit.edu.au](mailto:sarveshkumar.soni@rmit.edu.au)

**Table S1**

| <b>Enzymes</b>                                                                 | <b>% Conversion in 2 hours</b> | <b>Relative activity</b> |
|--------------------------------------------------------------------------------|--------------------------------|--------------------------|
| Lipase in de-ionized water                                                     | <b>65</b>                      | <b>79</b>                |
| Lipase in Butanol                                                              | <b>69</b>                      | <b>84</b>                |
| Lipase in [Bmim][BF <sub>4</sub> ]                                             | <b>25</b>                      | <b>30</b>                |
| Lipase capsules in [Bmim][PF <sub>6</sub> ],                                   | <b>48</b>                      | <b>58</b>                |
| Solid silica nano spheres with immobilized Lipase in [Bmim][BF <sub>4</sub> ]  | <b>37</b>                      | <b>45</b>                |
| Hollow silica nanocapsules with immobilized lipase in [Bmim][PF <sub>6</sub> ] | <b>82</b>                      | <b>100</b>               |

**Table S2**

| <b>Time (min)</b> | <b>Conversion (%)</b> | <b>Relative Conversion (%)</b> |
|-------------------|-----------------------|--------------------------------|
| <b>15</b>         | <b>.8</b>             | <b>1</b>                       |
| <b>30</b>         | <b>4</b>              | <b>5</b>                       |
| <b>45</b>         | <b>20</b>             | <b>25</b>                      |
| <b>60</b>         | <b>43</b>             | <b>52</b>                      |
| <b>75</b>         | <b>67</b>             | <b>82</b>                      |
| <b>90</b>         | <b>76</b>             | <b>93</b>                      |
| <b>105</b>        | <b>80</b>             | <b>98</b>                      |
| <b>120</b>        | <b>82</b>             | <b>100</b>                     |

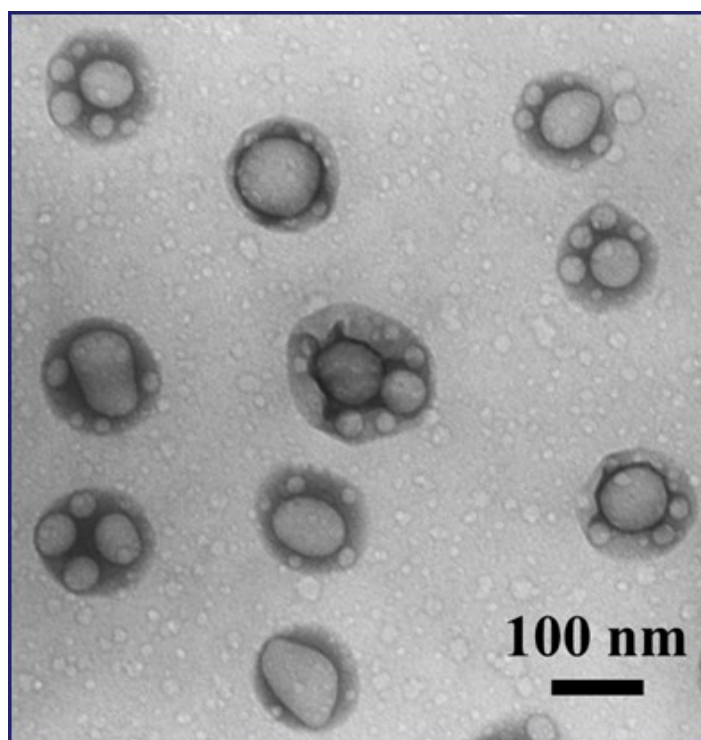

**Fig. S1** TEM images of self-assembled lipase ( $10\ \mu\text{g mL}^{-1}$ ) capsules synthesized in ionic liquid [Bmim][PF<sub>6</sub>]

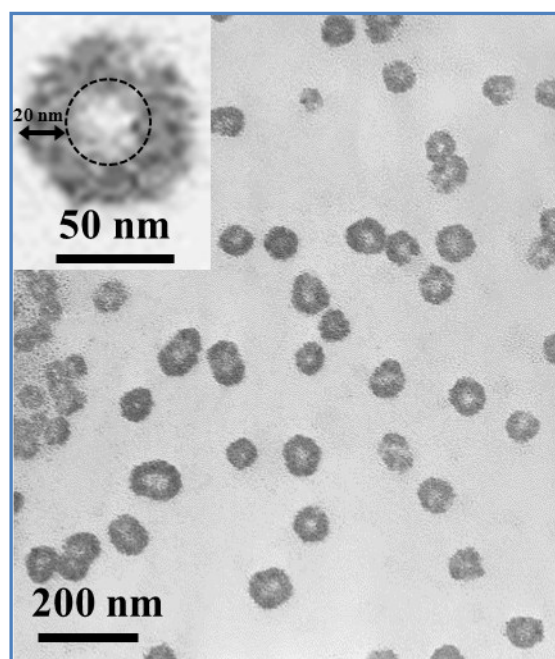

**Fig. S2** Silica hollow spheres synthesized by  $20 \mu\text{g mL}^{-1}$  Papain (Protease) Enzyme (21 KDa) in hydrophilic ionic liquid [Bmim][BF<sub>4</sub>]

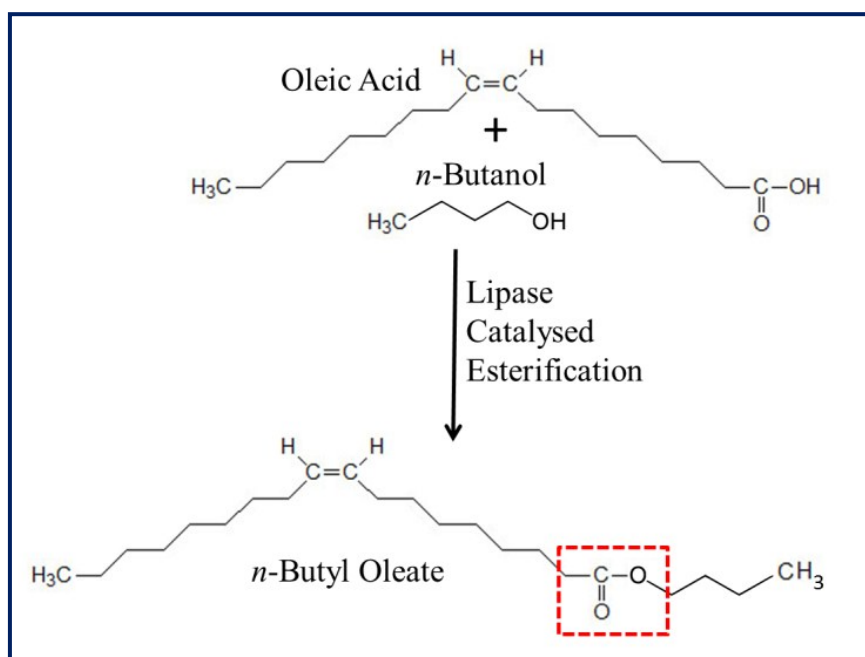

**Fig. S3** Lipase catalysed esterification of oleic acid and n-butanol to n-butyl oleate

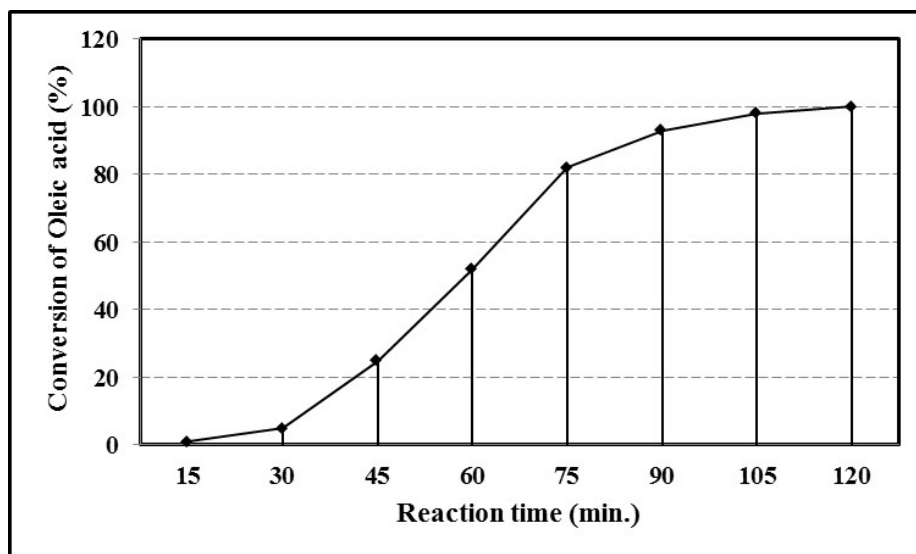

**Fig. S4** Time dependent kinetics of esterification by lipase immobilized hollow silica nanocapsules in [Bmim][PF<sub>6</sub>]
